# Supplementary material
Source: PubMed Central journal article supplement (PMC9629981)
Supplement: 10-1055-a-1951-3153-s202205ra0130.pdf [file 10-1055-a-1951-3153-s202205ra0130.pdf]

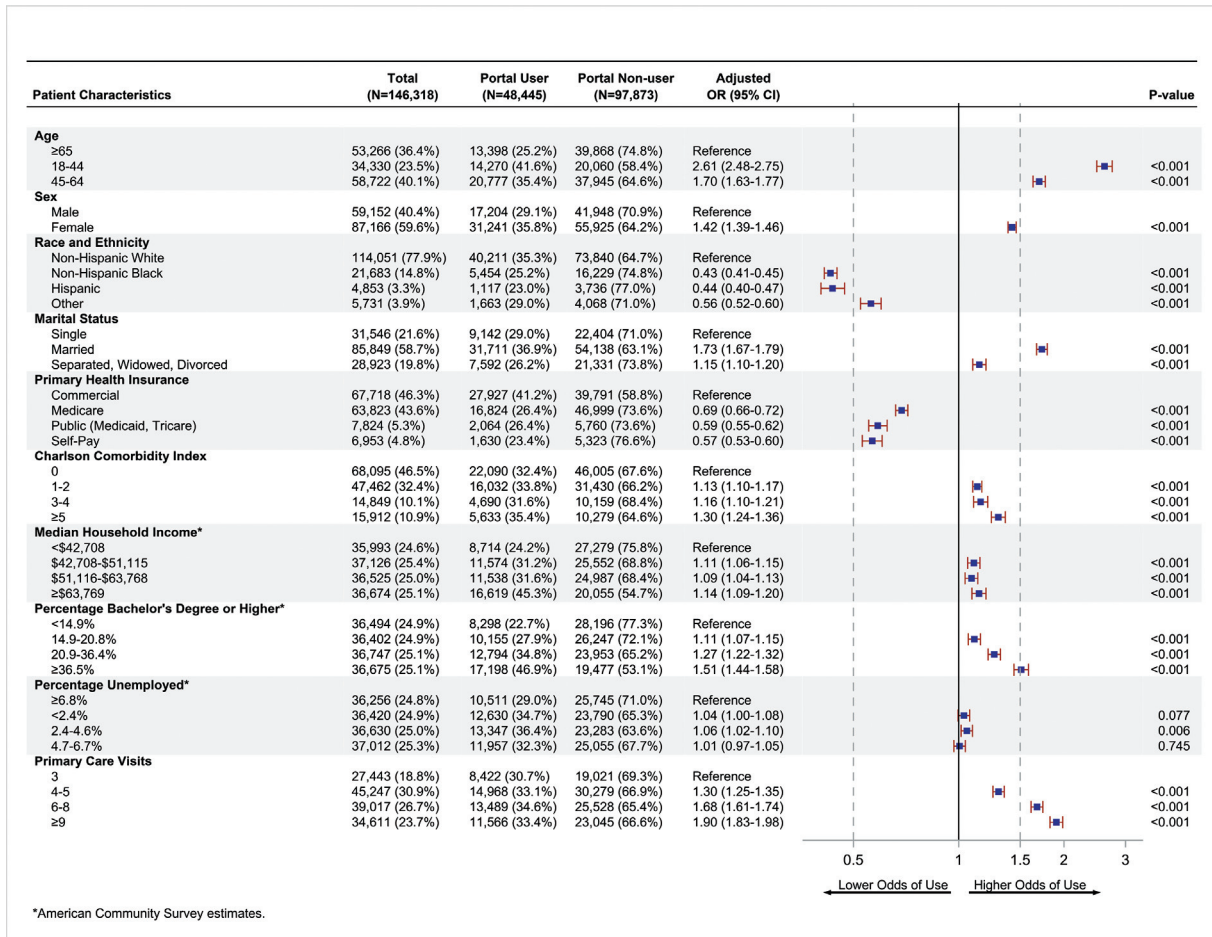

Supplementary Fig. S1 Association between patient characteristics and the odds of a portal user. Population is restricted to patients who had three or more primary care visits during the study period. A patient was defined as a portal user if they used any one of four bidirectional portal functions during the study period: (1) sent an appointment request message; (2) sent a medication renewal request message; (3) sent a medical advice message; and (4) directly scheduled an appointment.

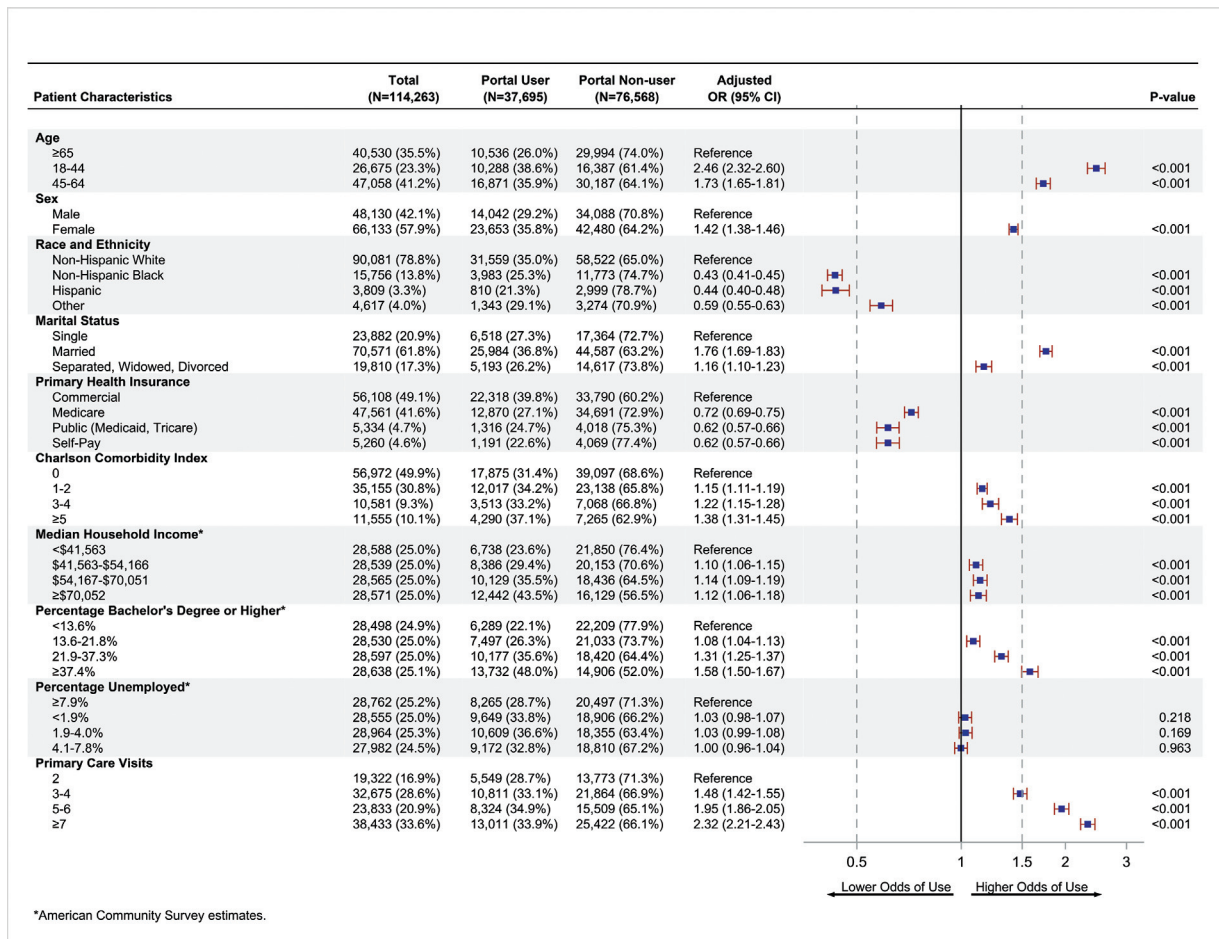

**Supplementary Fig. S2** Association between patient characteristics and the odds of a portal user. Population is restricted to patients who had ACS estimates as the census block group level. A patient was defined as a portal user if they used any one of four bidirectional portal functions during the study period: (1) sent an appointment request message; (2) sent a medication renewal request message; (3) sent a medical advice message; and (4) directly scheduled an appointment.

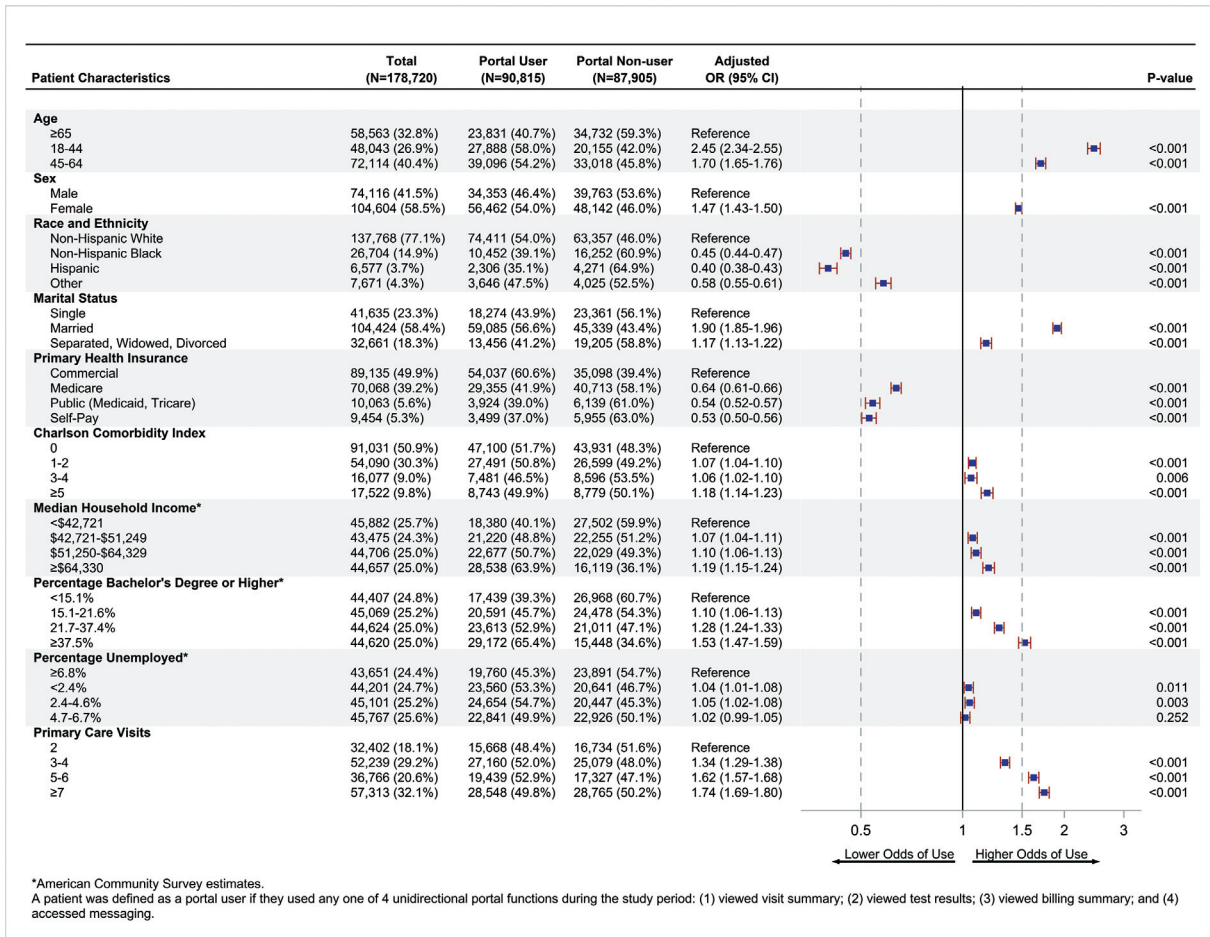

Supplementary Fig. S3 Association between patient characteristics and the odds of being a unidirectional portal user. A patient was defined as a portal user if they used any one of four unidirectional portal functions during the study period: (1) viewed visit summary; (2) viewed test results; (3) viewed billing summary; and (4) accessed messaging.

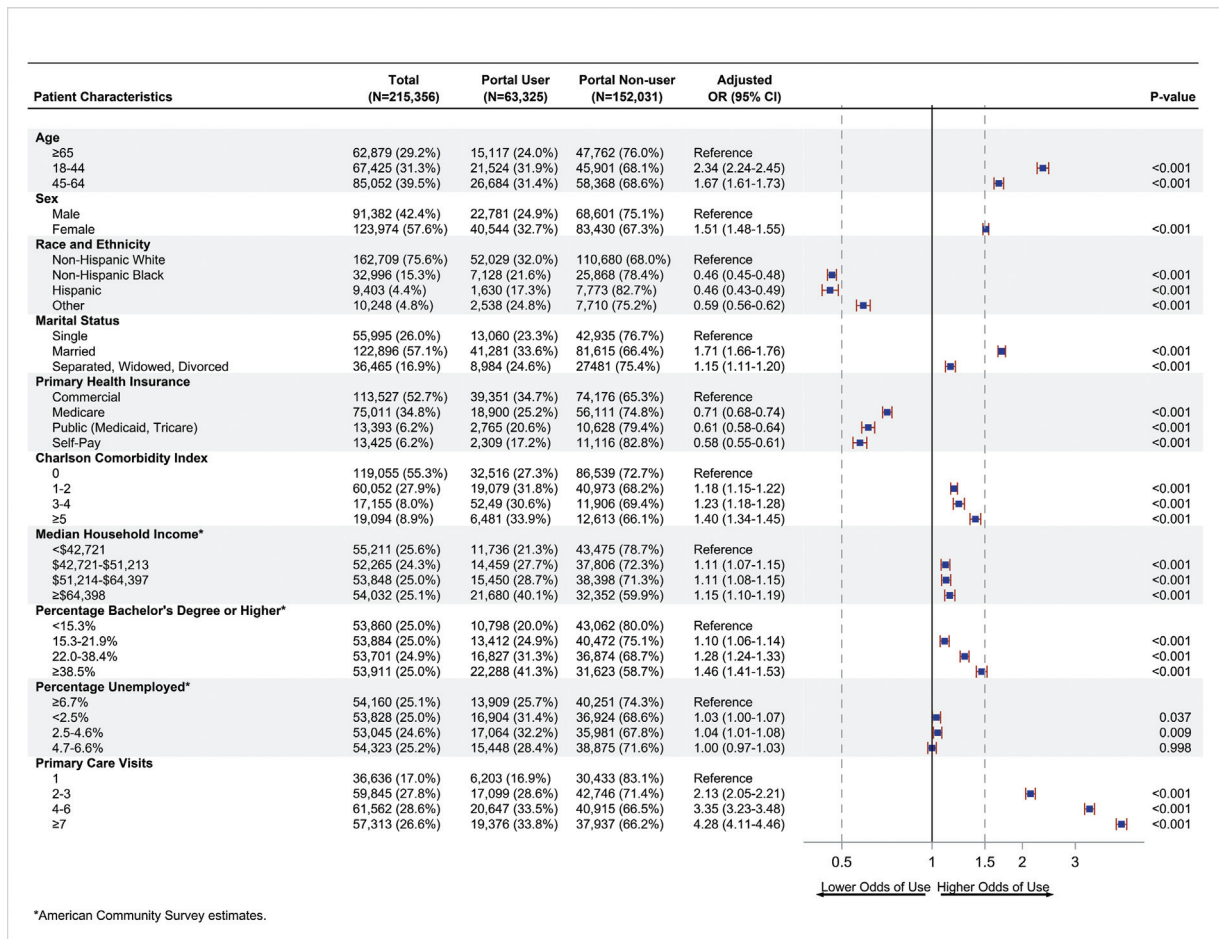

**Supplementary Fig. S4** Association between patient characteristics and the odds of being a portal user. Population is restricted to patients who had one or more primary care visits during the study period. A patient was defined as a portal user if they used any one of four bidirectional portal functions during the study period: (1) sent an appointment request message; (2) sent a medication renewal request message; (3) sent a medical advice message; and (4) directly scheduled an appointment.

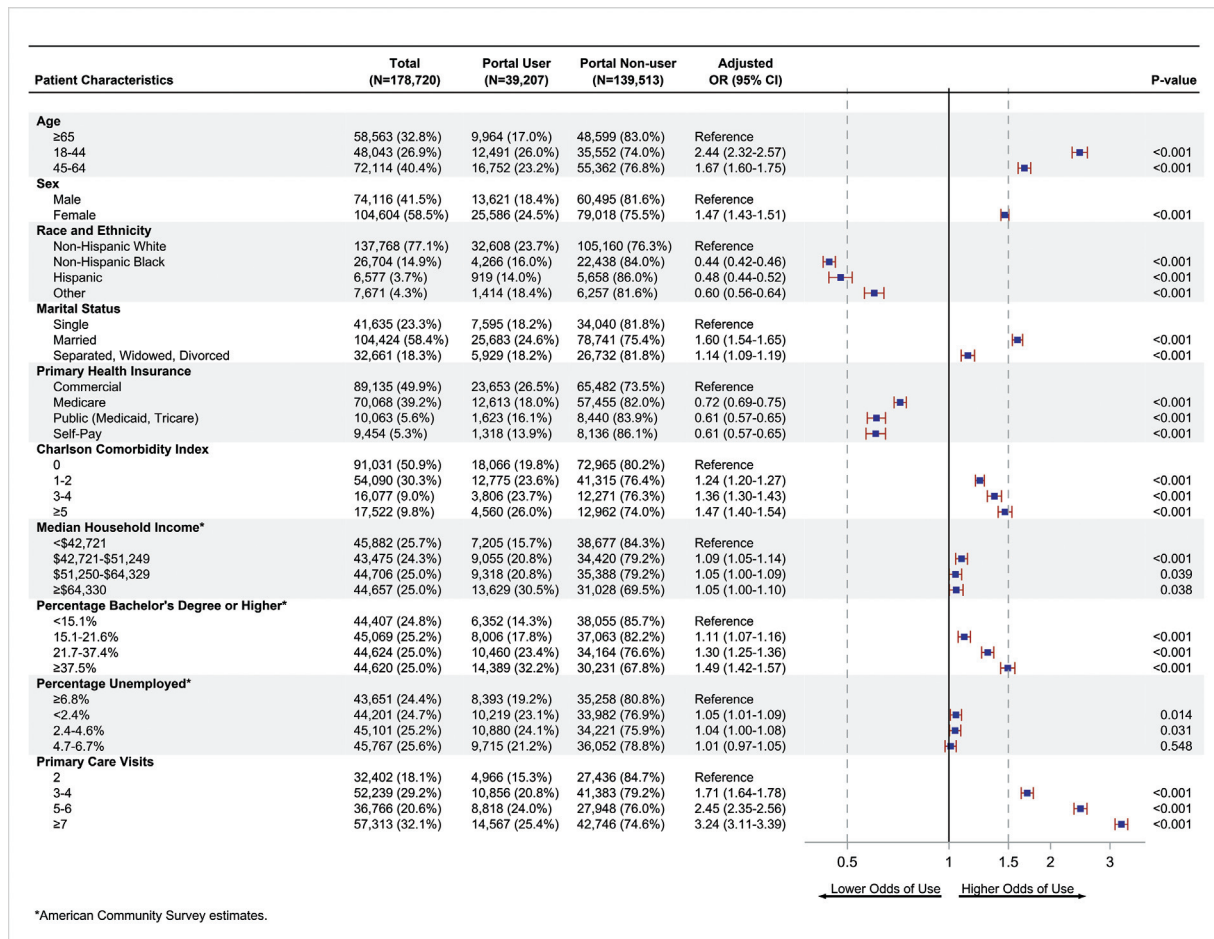

Supplementary Fig. S5 Association between patient characteristics and the odds of using three or more bidirectional portal functions. A patient was defined as a portal user if they used at least three of four bidirectional portal functions during the study period: (1) sent an appointment request message; (2) sent a medication renewal request message; (3) sent a medical advice message; and (4) directly scheduled an appointment.
